# Supplementary material for: The Relationship between Working Memory and Arithmetic in Primary School Children: A Meta-Analysis
Source: MDPI journal article supplement (doi:10.3390/brainsci13010022), 2022-12-22
Supplement: s1 [file s1]

# File S1

**File S1.** Key characteristics of included studies of the meta-analysis

| study                  | n   | Age    | r     | WM measures                                                                   | arithmetic measures                                                      |
|------------------------|-----|--------|-------|-------------------------------------------------------------------------------|--------------------------------------------------------------------------|
| Seethaler et al., 2006 | 315 | 104    | 0.220 | WJ-III Numbers Reversed                                                       | Addition and Subtraction Fact Fluency Test                               |
|                        | 315 | 104    | 0.270 | WJ-III Numbers Reversed                                                       | Double-Digit Addition and Subtraction subtests                           |
|                        | 315 | 104    | 0.340 | WMTB-C Listening Recall                                                       | Addition and Subtraction Fact Fluency Test                               |
|                        | 315 | 104    | 0.310 | WMTB-C Listening Recall                                                       | Double-Digit Addition and Subtraction subtests                           |
| Swanson, 2006          | 319 | 87.12  | 0.530 | Listening span, Backward digit span, Sentence task, Semantic association task | WRAT—III, WIAT, Test of Computational Fluency                            |
|                        | 319 | 87.12  | 0.380 | Visual-Matrix task, Mapping and direction task                                | WRAT—III, WIAT, Test of Computational Fluency                            |
| Lundberg et al., 2006  | 60  | 118    | 0.480 | Backward digit span (WISC)                                                    | Mental calculation                                                       |
|                        | 60  | 118    | 0.530 | Backward digit span (WISC)                                                    | Nonverbal algorithm computation                                          |
|                        | 60  | 106    | 0.390 | Backward digit span (WISC)                                                    | Mental calculation                                                       |
|                        | 60  | 106    | 0.410 | Backward digit span (WISC)                                                    | Nonverbal algorithm computation                                          |
| Fuchs et al., 2006     | 312 | 104.76 | 0.260 | WMTB-C Listening Recall                                                       | Math Fact Fluency test                                                   |
|                        | 312 | 104.76 | 0.280 | WMTB-C Listening Recall                                                       | Double-Digit Addition and Subtraction subtests                           |
|                        | 312 | 104.76 | 0.220 | WJ-III Numbers Reversed                                                       | Math Fact Fluency test                                                   |
|                        | 312 | 104.76 | 0.210 | WJ-III Numbers Reversed                                                       | Double-Digit Addition and Subtraction subtests                           |
| Holmes et al., 2006    | 148 | 106.93 | 0.260 | The maze memory task                                                          | Mental arithmetic developed from Qualifications and Curriculum Authority |
|                        | 148 | 106.93 | 0.510 | Listening recall task                                                         | Mental arithmetic                                                        |

|                         |     |     |       |                                                    |                                                              |
|-------------------------|-----|-----|-------|----------------------------------------------------|--------------------------------------------------------------|
| Swanson et al.,<br>2007 |     |     |       |                                                    | developed from<br>Qualifications and<br>Curriculum Authority |
|                         | 353 | 87  | 0.360 | Backward digit span                                | WRAT- III                                                    |
|                         | 353 | 87  | 0.350 | Backward digit span                                | WIAT                                                         |
|                         | 353 | 87  | 0.290 | Backward digit span                                | Math Fact Fluency test                                       |
|                         | 353 | 87  | 0.370 | Sentence span                                      | WRAT- III                                                    |
|                         | 353 | 87  | 0.390 | Sentence span                                      | WIAT                                                         |
|                         | 353 | 87  | 0.230 | Sentence span                                      | Math Fact Fluency test                                       |
|                         | 353 | 87  | 0.370 | Digit-sentence span                                | WRAT- III                                                    |
|                         | 353 | 87  | 0.350 | Digit-sentence span                                | WIAT                                                         |
|                         | 353 | 87  | 0.310 | Digit-sentence span                                | Math Fact Fluency test                                       |
|                         | 353 | 87  | 0.290 | Visual matrix task                                 | WRAT- III                                                    |
|                         | 353 | 87  | 0.300 | Visual matrix task                                 | WIAT                                                         |
|                         | 353 | 87  | 0.240 | Visual matrix task                                 | Math Fact Fluency test                                       |
|                         | 353 | 87  | 0.320 | Mapping and directions                             | WRAT- III                                                    |
|                         | 353 | 87  | 0.310 | Mapping and directions                             | WIAT                                                         |
|                         | 353 | 87  | 0.220 | Mapping and directions                             | Math Fact Fluency test                                       |
| Holmes et al.,<br>2008  |     |     |       |                                                    | Mental arithmetic                                            |
|                         | 51  | 91  | 0.150 | The visual patterns test                           | developed from<br>Qualifications and<br>Curriculum Authority |
|                         |     |     |       |                                                    | Mental arithmetic                                            |
|                         | 51  | 91  | 0.260 | The block recall task                              | developed from<br>Qualifications and<br>Curriculum Authority |
|                         |     |     |       |                                                    | Mental arithmetic                                            |
| Holmes et al.,<br>2008  | 51  | 91  | 0.270 | The visual patterns test,<br>the block recall task | developed from<br>Qualifications and<br>Curriculum Authority |
|                         |     |     |       |                                                    | Mental arithmetic                                            |
|                         | 56  | 115 | 0.220 | The visual patterns test                           | developed from<br>Qualifications and<br>Curriculum Authority |
|                         |     |     |       |                                                    | Mental arithmetic                                            |
|                         | 56  | 115 | 0.120 | The block recall task                              | developed from<br>Qualifications and<br>Curriculum Authority |
| Holmes et al.,<br>2008  |     |     |       |                                                    | Mental arithmetic                                            |
|                         | 56  | 115 | 0.200 | The visual patterns test,<br>the block recall task | developed from<br>Qualifications and<br>Curriculum Authority |

|                        |     |        |       |                                      |                        |
|------------------------|-----|--------|-------|--------------------------------------|------------------------|
| Berg, 2008             | 90  | 121.5  | 0.520 | Semantic categorization              | WRAT- III              |
|                        | 90  | 121.5  | 0.320 | Auditory digit sequencing            | WRAT- III              |
|                        | 90  | 121.5  | 0.440 | Visual matrix task                   | WRAT- III              |
|                        | 90  | 121.5  | 0.460 | Corsi block                          | WRAT- III              |
| Fuchs et al., 2010     | 205 | 73.44  | 0.470 | WMTB-C Listening recall              | Math Fact Fluency test |
|                        | 205 | 73.44  | 0.350 | Block recall, Maze memory            | Math Fact Fluency test |
| Lee et al., 2011       | 151 | 120.58 | 0.290 | Listening recall task                | WIAT (group 1)         |
|                        | 151 | 120.58 | 0.240 | Listening recall task                | WIAT (group 2)         |
|                        | 151 | 120.58 | 0.230 | Listening recall task                | WIAT (group 3)         |
|                        | 151 | 120.58 | 0.260 | Mr. X task                           | WIAT (group 1)         |
|                        | 151 | 120.58 | 0.120 | Mr. X task                           | WIAT (group 2)         |
|                        | 151 | 120.58 | 0.180 | Mr. X task                           | WIAT (group 3)         |
|                        | 142 | 132.58 | 0.240 | Listening recall task                | WIAT (group 1)         |
|                        | 142 | 132.58 | 0.220 | Listening recall task                | WIAT (group 2)         |
|                        | 142 | 132.58 | 0.210 | Listening recall task                | WIAT (group 3)         |
|                        | 142 | 132.58 | 0.290 | Mr. X task                           | WIAT (group 1)         |
|                        | 142 | 132.58 | 0.220 | Mr. X task                           | WIAT (group 2)         |
|                        | 142 | 132.58 | 0.270 | Mr. X task                           | WIAT (group 3)         |
| Lan et al., 2011       | 119 | 60.24  | 0.440 | the Sentence completion task         | verbal calculation     |
|                        | 139 | 58.8   | 0.240 | the Sentence completion task         | verbal calculation     |
| Seethaler et al., 2011 | 688 | 96     | 0.200 | Listening recall task                | Math Fact Fluency test |
|                        | 688 | 96     | 0.210 | WJ-III Numbers Reversed              | Math Fact Fluency test |
|                        | 688 | 96     | 0.260 | Listening recall task                | WRAT- III              |
|                        | 688 | 96     | 0.260 | WJ-III Numbers Reversed              | WRAT- III              |
| Zheng et al., 2011     | 310 | 105.36 | 0.390 | Listening sentence span              | WIAT                   |
|                        | 310 | 105.36 | 0.380 | Listening sentence span              | WRAT- III              |
|                        | 310 | 105.36 | 0.310 | Digit-sentence span                  | WIAT                   |
|                        | 310 | 105.36 | 0.330 | Digit-sentence span                  | WRAT- III              |
|                        | 310 | 105.36 | 0.260 | Visual matrix task                   | WIAT                   |
|                        | 310 | 105.36 | 0.290 | Visual matrix task                   | WRAT- III              |
|                        | 310 | 105.36 | 0.230 | Mapping and directions               | WIAT                   |
| Simmons et al., 2012   | 310 | 105.36 | 0.240 | Mapping and directions               | WRAT- III              |
|                        | 41  | 70     | 0.110 | Mazes memory test, Block recall test | Mental addition        |

|                         |     |        |       |                                                                   |                             |
|-------------------------|-----|--------|-------|-------------------------------------------------------------------|-----------------------------|
| Arndt et al.,<br>2013   | 41  | 70     | 0.670 | Odd-one-out, spatial recall, listening recall, backward word span | Mental addition             |
|                         | 49  | 95     | 0.330 | Mazes memory test, Block recall test                              | Mental multiplication       |
|                         | 49  | 95     | 0.240 | Odd-one-out, spatial recall, listening recall, backward word span | Mental multiplication       |
|                         | 66  | 76.5   | 0.252 | Corsi blocks, Matrices task                                       | Addition                    |
|                         | 66  | 76.5   | 0.253 | Corsi blocks, Matrices task                                       | Multiplication              |
|                         | 66  | 76.5   | 0.334 | Corsi blocks, Matrices task                                       | Division                    |
|                         | 66  | 76.5   | 0.265 | Colour span backward, Digit span backward, Listening span         | Addition                    |
|                         | 66  | 76.5   | 0.248 | Colour span backward, Digit span backward, Listening span         | Multiplication              |
|                         | 66  | 76.5   | 0.211 | Colour span backward, Digit span backward, Listening span         | Division                    |
| Jordan et al.,<br>2013  | 357 | 105.97 | 0.228 | WMTB-C counting recall                                            | WIAT addition fluency test  |
|                         | 357 | 105.97 | 0.354 | WMTB-C counting recall                                            | WRAT-4                      |
|                         | 357 | 105.97 | 0.341 | WMTB-C counting recall                                            | WRAT-4                      |
| Vukovic et al.,<br>2013 | 113 | 94     | 0.200 | S-CPT Visual matrix task                                          | SDMT-4 computation          |
|                         | 113 | 94     | 0.190 | S-CPT Visual matrix task                                          | SDMT-4 computation          |
|                         | 134 | 142    | 0.300 | Listening span                                                    | Arithmetic fact retrieval   |
| Träff, 2013             | 134 | 142    | 0.270 | Listening span                                                    | Arithmetic calculation task |
|                         | 134 | 142    | 0.380 | Visual matrix span                                                | Arithmetic fact retrieval   |
|                         | 134 | 142    | 0.380 | Visual matrix span                                                | Arithmetic calculation task |
| Vukovic et al.,<br>2013 | 167 | 82     | 0.240 | S-CPT Visual matrix task                                          | SDMT-4 computation          |
|                         | 167 | 82     | 0.220 | S-CPT Visual matrix                                               | SDMT-4 computation          |

|                         |     |        |       |                           |                                          |
|-------------------------|-----|--------|-------|---------------------------|------------------------------------------|
|                         |     |        |       | task                      |                                          |
|                         | 167 | 82     | 0.250 | S-CPT Visual matrix task  | SDMT-4 computation                       |
|                         | 167 | 82     | 0.190 | S-CPT Visual matrix task  | SDMT-4 computation                       |
|                         | 167 | 94     | 0.230 | S-CPT Visual matrix task  | SDMT-4 computation                       |
|                         | 167 | 94     | 0.200 | S-CPT Visual matrix task  | SDMT-4 computation                       |
|                         | 167 | 94     | 0.200 | S-CPT Visual matrix task  | SDMT-4 computation                       |
|                         | 157 | 118    | 0.210 | Backward digit span       | Key Math A/WJ-R arithmetic               |
| LeFevre et al., 2013    | 157 | 118    | 0.330 | Spatial span              | Key Math A/WJ-R arithmetic               |
|                         | 157 | 118    | 0.220 | Backward digit span       | Key Math A/WJ-R arithmetic               |
|                         | 157 | 118    | 0.150 | Spatial span              | Key Math A/WJ-R arithmetic               |
|                         | 129 | 99.34  | 0.047 | Number recall             | Addition                                 |
| Kleemans et al., 2014   | 129 | 99.34  | 0.190 | Number recall             | Subtraction                              |
|                         | 129 | 99.34  | 0.040 | Memory span               | Addition                                 |
|                         | 129 | 99.34  | 0.157 | Memory span               | Subtraction                              |
|                         | 189 | 73.92  | 0.360 | Shape and position recall | Math Fact Fluency test                   |
| Martin et al., 2014     | 189 | 73.92  | 0.270 | Shape and position recall | WRAT- III                                |
|                         | 192 | 73.92  | 0.460 | Digit backward span       | Math Fact Fluency test                   |
|                         | 192 | 73.92  | 0.380 | Digit backward span       | WRAT- III                                |
| Fuchs et al., 2015      | 206 | 90     | 0.340 | WMTB-C Counting recall    | Arithmetic combinations                  |
|                         | 206 | 90     | 0.350 | WMTB-C Listening recall   | Arithmetic combinations                  |
| Mix et al., 2016        | 854 | 107.81 | 0.243 | Visual matrix task        | Whole number calculation                 |
| Cirino et al., 2016     | 162 | 148.8  | 0.276 | Automated Symmetry Span   | Single-digit addition and multiplication |
|                         | 162 | 148.8  | 0.325 | Automated Symmetry Span   | Procedural computation                   |
|                         | 133 | 116.28 | 0.320 | Visual matrix task        | Multidigit calculation                   |
| Skagerlund et al., 2016 | 133 | 116.28 | 0.360 | Visual matrix task        | Arithmetic equations                     |
|                         | 133 | 116.28 | 0.310 | Visual matrix task        | Arithmetic fact retrieval                |
|                         | 133 | 116.28 | 0.220 | Sentence span             | Multidigit calculation                   |
|                         | 133 | 116.28 | 0.200 | Sentence span             | Arithmetic equations                     |

|                       |     |        |       |                                                   |                                             |
|-----------------------|-----|--------|-------|---------------------------------------------------|---------------------------------------------|
| Swanson & Fung, 2016  | 133 | 116.28 | 0.190 | Sentence span                                     | Arithmetic fact retrieval                   |
|                       | 392 | 100.68 | 0.230 | The mapping and direction span, the visual matrix | WRAT- III, WIAT                             |
|                       | 30  | 133.08 | 0.130 | digit span backward                               | multiple-step 3-digit multiplication        |
|                       | 30  | 133.08 | 0.100 | digit span backward                               | single-step 3-digit multiplication          |
| Liu et al., 2017      | 41  | 133.08 | 0.390 | phonological loop task                            | multiple-step 2-digit multiplication        |
|                       | 41  | 133.08 | 0.290 | phonological loop task                            | multiple-step 2-digit multiplication        |
|                       | 41  | 133.08 | 0.380 | eye chart E task                                  | multiple-step 2-digit multiplication        |
|                       | 41  | 133.08 | 0.200 | eye chart E task                                  | multiple-step 2-digit multiplication        |
| Wong, 2017            | 124 | 73     | 0.241 | Backward digit span                               | Arithmetic computation                      |
| Zhang et al., 2017    | 346 | 95     | 0.220 | Backward digit span                               | Written computation                         |
| Ching et al., 2017    | 115 | 76.32  | 0.350 | Digit span backward, counting recall              | Addition and Subtraction                    |
|                       | 115 | 76.32  | 0.420 | Digit span backward, counting recall              | Addition and Subtraction                    |
|                       | 115 | 76.32  | 0.060 | Corsi block                                       | Addition and Subtraction                    |
|                       | 115 | 76.32  | 0.140 | Corsi block                                       | Addition and Subtraction                    |
| Korhonen et al., 2018 | 624 | 112.2  | 0.190 | Operation span                                    | Written arithmetic                          |
|                       | 624 | 112.2  | 0.240 | Operation span                                    | Numeric understanding and mental arithmetic |
|                       | 624 | 112.2  | 0.200 | Digit backward span                               | Written arithmetic                          |
|                       | 624 | 112.2  | 0.200 | Digit backward span                               | Numeric understanding and mental arithmetic |
|                       | 624 | 112.2  | 0.180 | The block forward span                            | Written arithmetic                          |
|                       | 624 | 112.2  | 0.160 | The block forward span                            | Numeric understanding and mental arithmetic |
|                       | 624 | 112.2  | 0.150 | The block backward span                           | Written arithmetic                          |
|                       | 624 | 112.2  | 0.180 | The block backward span                           | Numeric understanding and mental arithmetic |
| Träff et al., 2018    | 269 | 114.72 | 0.190 | Complex word repetition                           | Arithmetic fluency test                     |
|                       | 269 | 114.72 | 0.230 | Complex word repetition                           | Arithmetic fact retrieval                   |

|                         |     |        |       |                                          |                                                          |
|-------------------------|-----|--------|-------|------------------------------------------|----------------------------------------------------------|
| Fuchs et al.,<br>2018   | 269 | 114.72 | 0.160 | Complex word repetition                  | Multi-digit calculation                                  |
|                         | 325 | 90     | 0.360 | WMTB-C Listening recall                  | 2-grade calculations<br>battery-arithmetic               |
|                         | 325 | 90     | 0.350 | WMTB-C Listening recall                  | Addition and subtraction                                 |
|                         | 325 | 90     | 0.380 | WMTB-C Counting recall                   | 2-grade calculations<br>battery-arithmetic               |
|                         | 325 | 90     | 0.410 | WMTB-C Counting recall                   | Addition and subtraction                                 |
| Morris et al.,<br>2019  | 135 | 91.97  | 0.678 | Backward spatial span                    | WIAT numerical operations                                |
|                         | 135 | 91.97  | 0.658 | Backward digit span                      | WIAT numerical operations                                |
| Georges et al.,<br>2019 | 68  | 114.36 | 0.240 | Visual matrix task                       | The Heidelberg mathematics test-addition                 |
|                         | 68  | 114.36 | 0.290 | Visual matrix task                       | The Heidelberg mathematics test-subtraction              |
|                         | 68  | 114.36 | 0.230 | Visual matrix task                       | The Heidelberg mathematics test-multiplication           |
|                         | 68  | 114.36 | 0.280 | Visual matrix task                       | The Heidelberg mathematics test-division                 |
|                         | 68  | 114.36 | 0.310 | Visual matrix task                       | The Heidelberg mathematics test-addition and subtraction |
| Soltani et al.,<br>2020 | 113 | 94.92  | 0.340 | Counting span                            | Mental arithmetic                                        |
| Yang et al.,<br>2020    | 155 | 93     | 0.420 | Backward digit span                      | addition, subtraction, and multiplication                |
|                         | 155 | 93     | 0.380 | Backward digit span                      | addition, subtraction, and multiplication                |
| Allen et al.,<br>2020   | 197 | 95.99  | 0.221 | Spatial-simultaneous 4×3 matrix          | Access Mathematics Test calculating                      |
|                         | 197 | 95.99  | 0.282 | Spatial-simultaneous 4×4 matrix          | Access Mathematics Test calculating                      |
|                         | 197 | 95.99  | 0.191 | Spatial-sequential 3×3 matrix (no order) | Access Mathematics Test calculating                      |
|                         | 197 | 95.99  | 0.209 | Spatial-sequential 4×4 matrix (no order) | Access Mathematics Test calculating                      |

|                        |      |        |       |                                                       |                                        |
|------------------------|------|--------|-------|-------------------------------------------------------|----------------------------------------|
| Magalhaes et al., 2021 | 197  | 95.99  | 0.150 | Block recall                                          | Access Mathematics<br>Test calculating |
|                        | 197  | 95.99  | 0.234 | WMTB-C Backward digit span                            | Access Mathematics<br>Test calculating |
|                        | 197  | 95.99  | 0.216 | WMTB-C Counting recall                                | Access Mathematics<br>Test calculating |
|                        | 134  | 121.56 | 0.440 | Listening sentence span                               | Numerical operations                   |
|                        | 134  | 121.56 | 0.500 | Listening sentence span                               | Arithmetic fluency test                |
|                        | 182  | 93.6   | 0.190 | Digit backward span                                   | Addition                               |
|                        | 182  | 93.6   | 0.280 | Digit backward span                                   | Subtraction                            |
|                        | 182  | 93.6   | 0.180 | Spatial span                                          | Addition                               |
|                        | 182  | 93.6   | 0.200 | Spatial span                                          | Subtraction                            |
|                        | 182  | 93.6   | 0.200 | Digit backward span                                   | Addition                               |
| Xu et al., 2021        | 182  | 93.6   | 0.250 | Digit backward span                                   | Subtraction                            |
|                        | 182  | 93.6   | 0.240 | Digit backward span                                   | Multiplication                         |
|                        | 182  | 93.6   | 0.100 | Spatial span                                          | Addition                               |
|                        | 182  | 93.6   | 0.090 | Spatial span                                          | Subtraction                            |
|                        | 182  | 93.6   | 0.070 | Spatial span                                          | Multiplication                         |
|                        | 122  | 115.56 | 0.326 | Forward span/backward span/dot-matrix forward word    | the AC-FL calculation                  |
| Rivella et al., 2021   | 122  | 115.56 | 0.351 | span/backward word span/listening span                | the AC-FL calculation                  |
|                        | 1157 | 152.63 | 0.220 | Digit backward span                                   | Arithmetic fluency test                |
| Scofield et al., 2021  | 1157 | 152.63 | 0.380 | Digit backward span                                   | Fractions arithmetic                   |
|                        | 1157 | 152.63 | 0.310 | Corsi block tapping                                   | Arithmetic fluency test                |
|                        | 1157 | 152.63 | 0.350 | Corsi block tapping                                   | Fractions arithmetic                   |
| Xu et al., 2021        | 106  | 97     | 0.450 | digit forward span, digit backward span, spatial span | Arithmetic fluency test                |
|                        | 54   | 98     | 0.340 | digit forward span, digit backward span, spatial span | Arithmetic fluency test                |
|                        | 126  | 99.96  | 0.590 | Corsi block tapping                                   | School achievement test-arithmetic     |
| Vieira et al., 2021    | 126  | 99.96  | 0.430 | WISC digit span                                       | School achievement test-arithmetic     |
|                        | 39   | 89.45  | 0.600 | Dot matrix                                            | BAS arithmetic                         |
| Allen et al., 2022     | 39   | 89.45  | 0.560 | Dot matrix                                            | WISC-mental arithmetic                 |
